CORRECTION

# Correction: Male Sexual Behavior and Pheromone Emission Is Enhanced by Exposure to Guava Fruit Volatiles in *Anastrepha fraterculus*

Guillermo E. Bachmann, Diego F. Segura, Francisco Devescovi, M. Laura Juárez, M. Josefina Ruiz, M. Teresa Vera, Jorge L. Cladera, Peter E. A. Teal, Patricia C. Fernández

[Fig 1](#) is incorrect. Please view the correct [Fig 1](#) here.

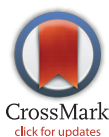

## OPEN ACCESS

**Citation:** Bachmann GE, Segura DF, Devescovi F, Juárez ML, Ruiz MJ, Vera MT, et al. (2015) Correction: Male Sexual Behavior and Pheromone Emission Is Enhanced by Exposure to Guava Fruit Volatiles in *Anastrepha fraterculus*. PLoS ONE 10(5): e0129523. doi:10.1371/journal.pone.0129523

**Published:** May 29, 2015

**Copyright:** © 2015 Bachmann et al. This is an open access article distributed under the terms of the [Creative Commons Attribution License](#), which permits unrestricted use, distribution, and reproduction in any medium, provided the original author and source are credited.

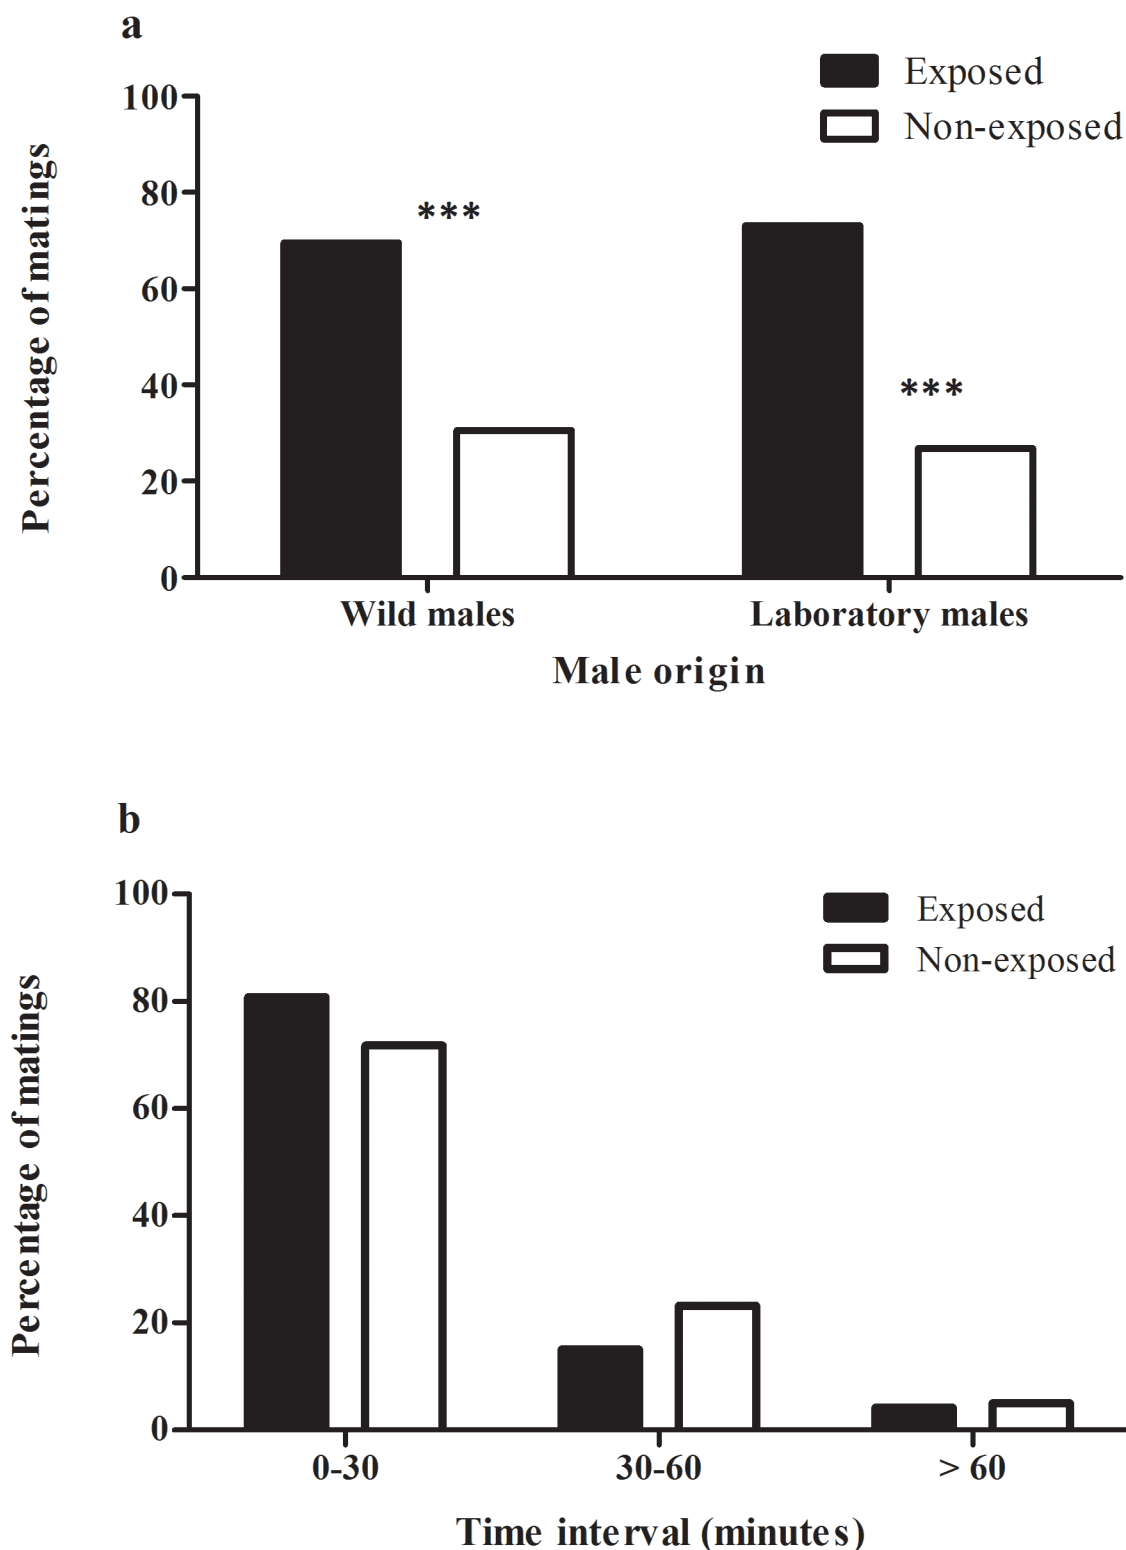

**Fig 1. Effect of guava exposure on male mating success and time of mating pair formation.** a) Percentage of matings obtained by guava-exposed and non-exposed *Anastrepha fraterculus* males for wild and laboratory populations (asterisks indicate G-Test:  $P < 0.001$ ,  $N = 130$  for laboratory and  $N = 329$  for wild males). b) Percentage of matings according to time of mating pair formation for guava-exposed and non-exposed males (Chi square Test  $P < 0.001$  for both, laboratory and wild males). In all cases wild females were used in the mating tests.

doi:10.1371/journal.pone.0129523.g001

## Reference

1. Bachmann GE, Segura DF, Devescovi F, Juárez ML, Ruiz MJ, Vera MT, et al. (2015) Male Sexual Behavior and Pheromone Emission Is Enhanced by Exposure to Guava Fruit Volatiles in *Anastrepha fraterculus*. PLoS ONE 10(4): e0124250. doi: [10.1371/journal.pone.0124250](https://doi.org/10.1371/journal.pone.0124250) PMID: [25923584](https://pubmed.ncbi.nlm.nih.gov/25923584/)
